# Supplementary material for: Self-Directed Engagement with a Mobile App (Sinasprite) and Its Effects on Confidence in Coping Skills, Depression, and Anxiety: Retrospective Longitudinal Study
Source: PubMed Central journal article supplement (PMC5878360; doi:10.2196/mhealth.9612), 2018-03-16

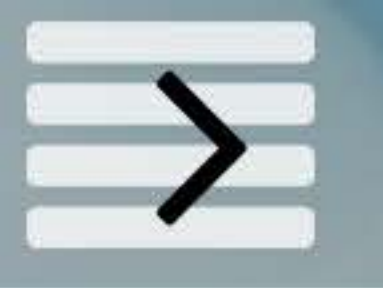

Butterfly Walk

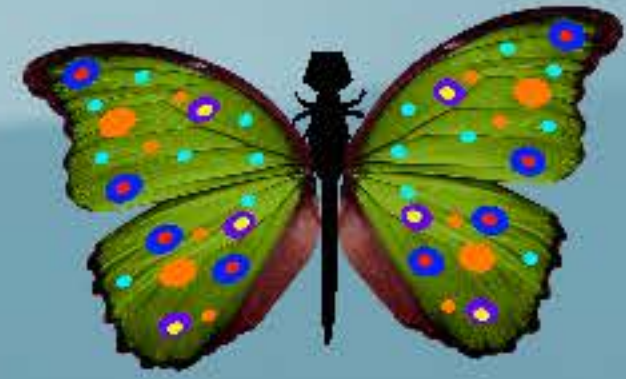

Meditation

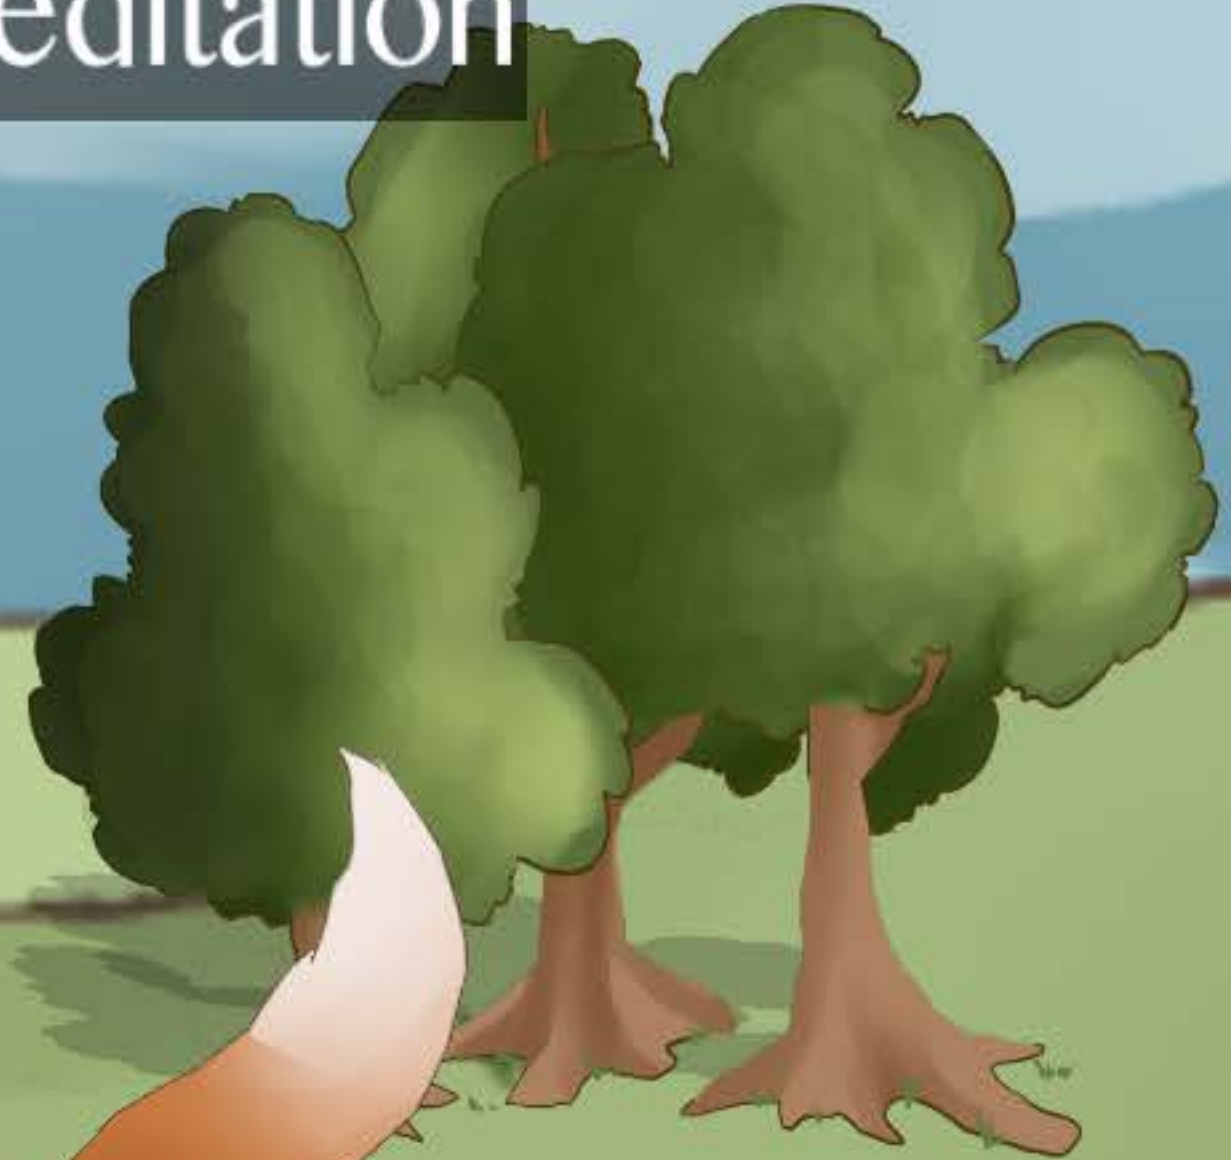

Shrine

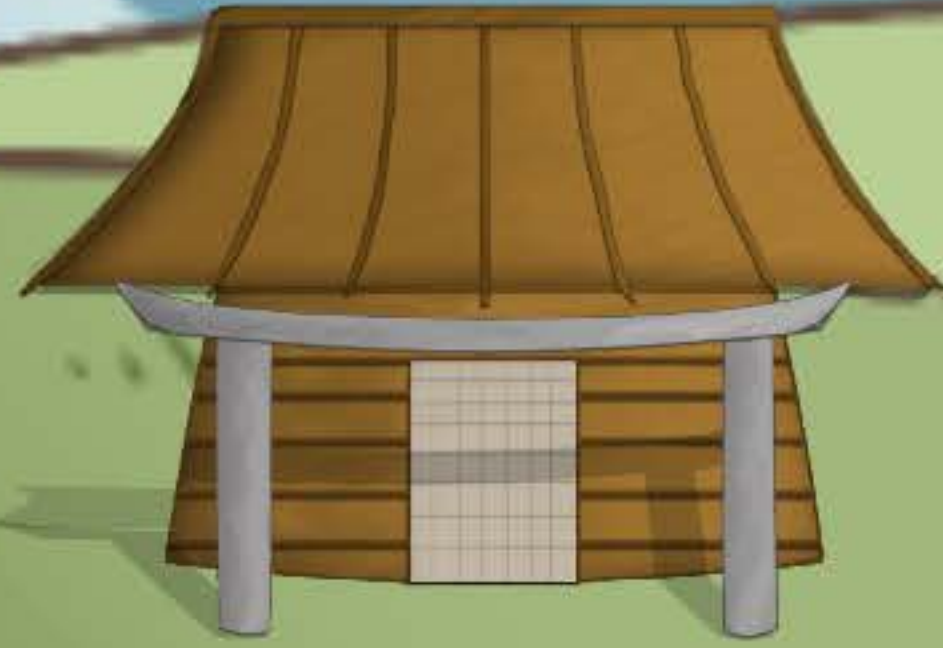

Journal

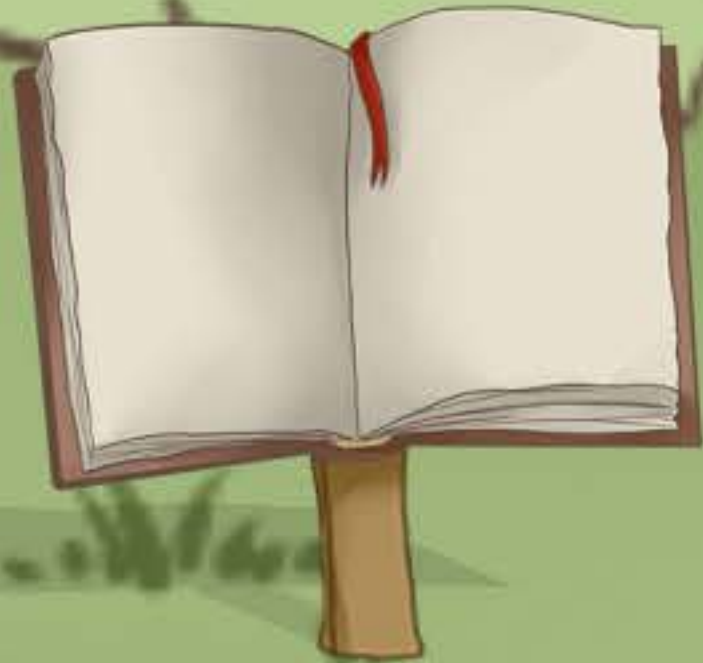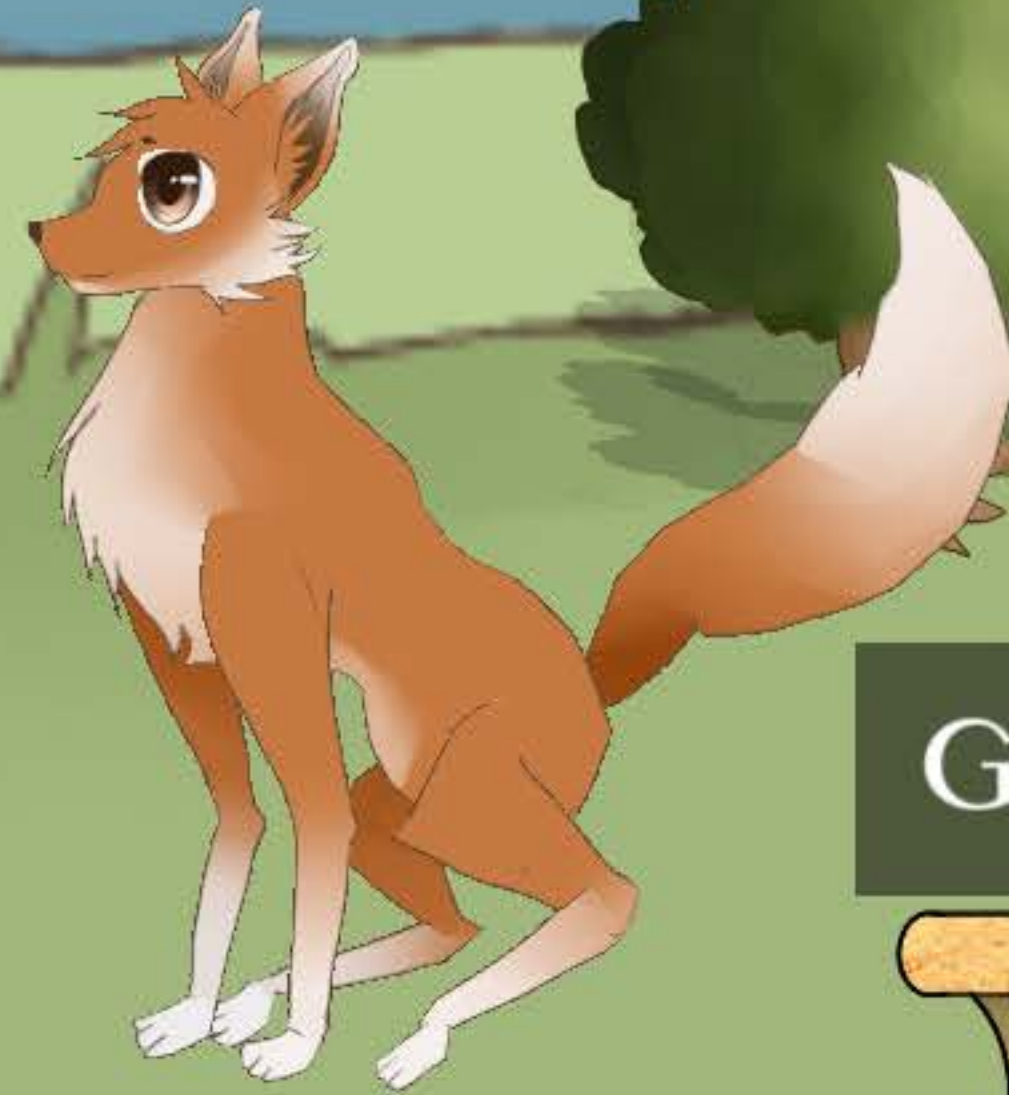

Gratitude

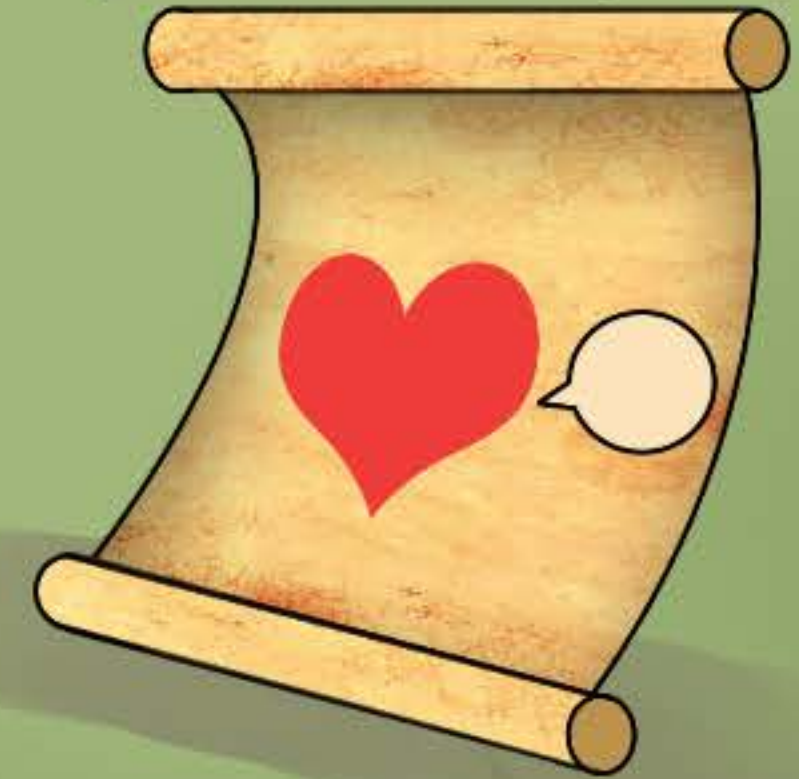

Oracle

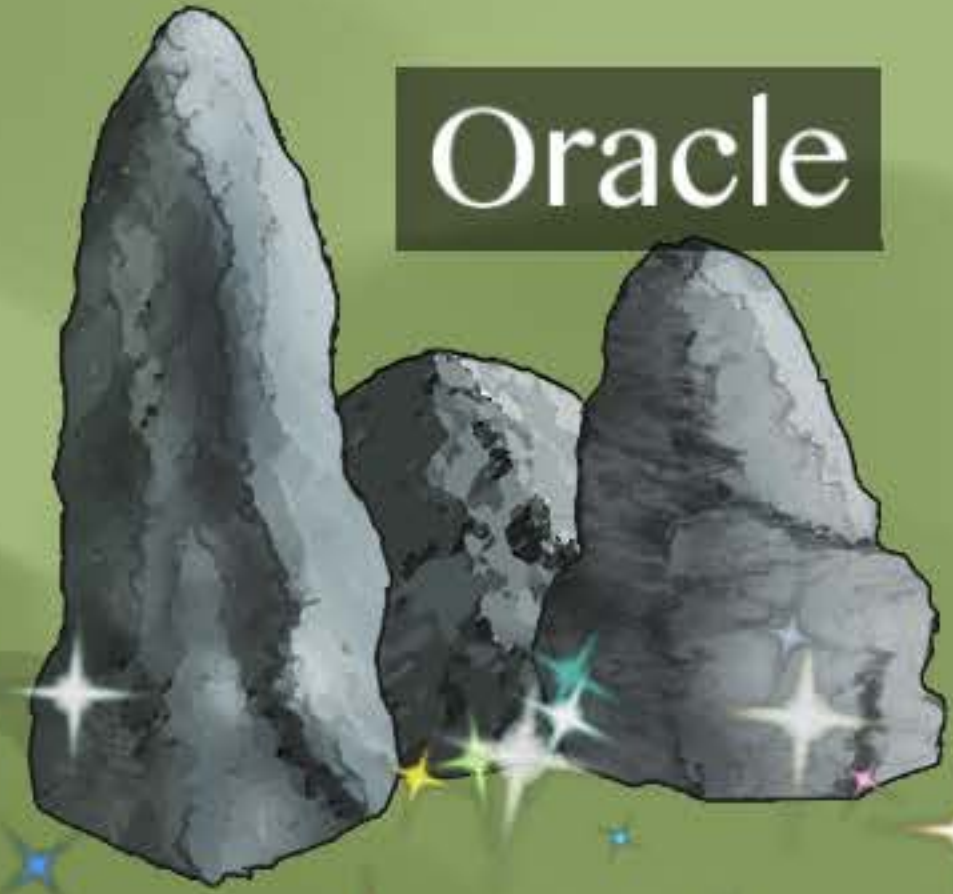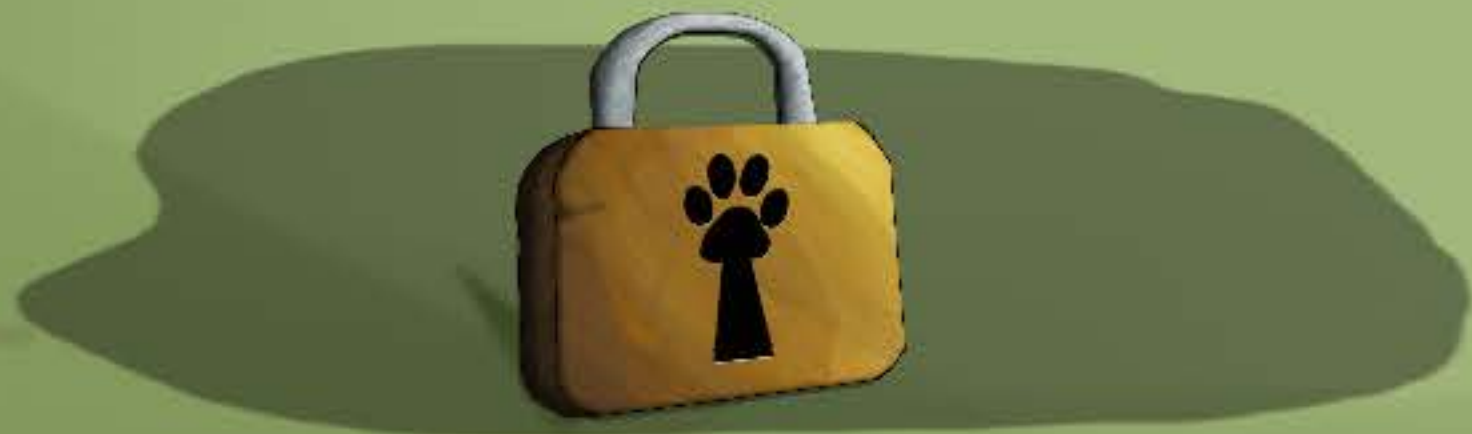

Take several nice,  
deep breaths  
along with Socks.

Breathe in  
through your  
nose and out  
through your  
mouth.

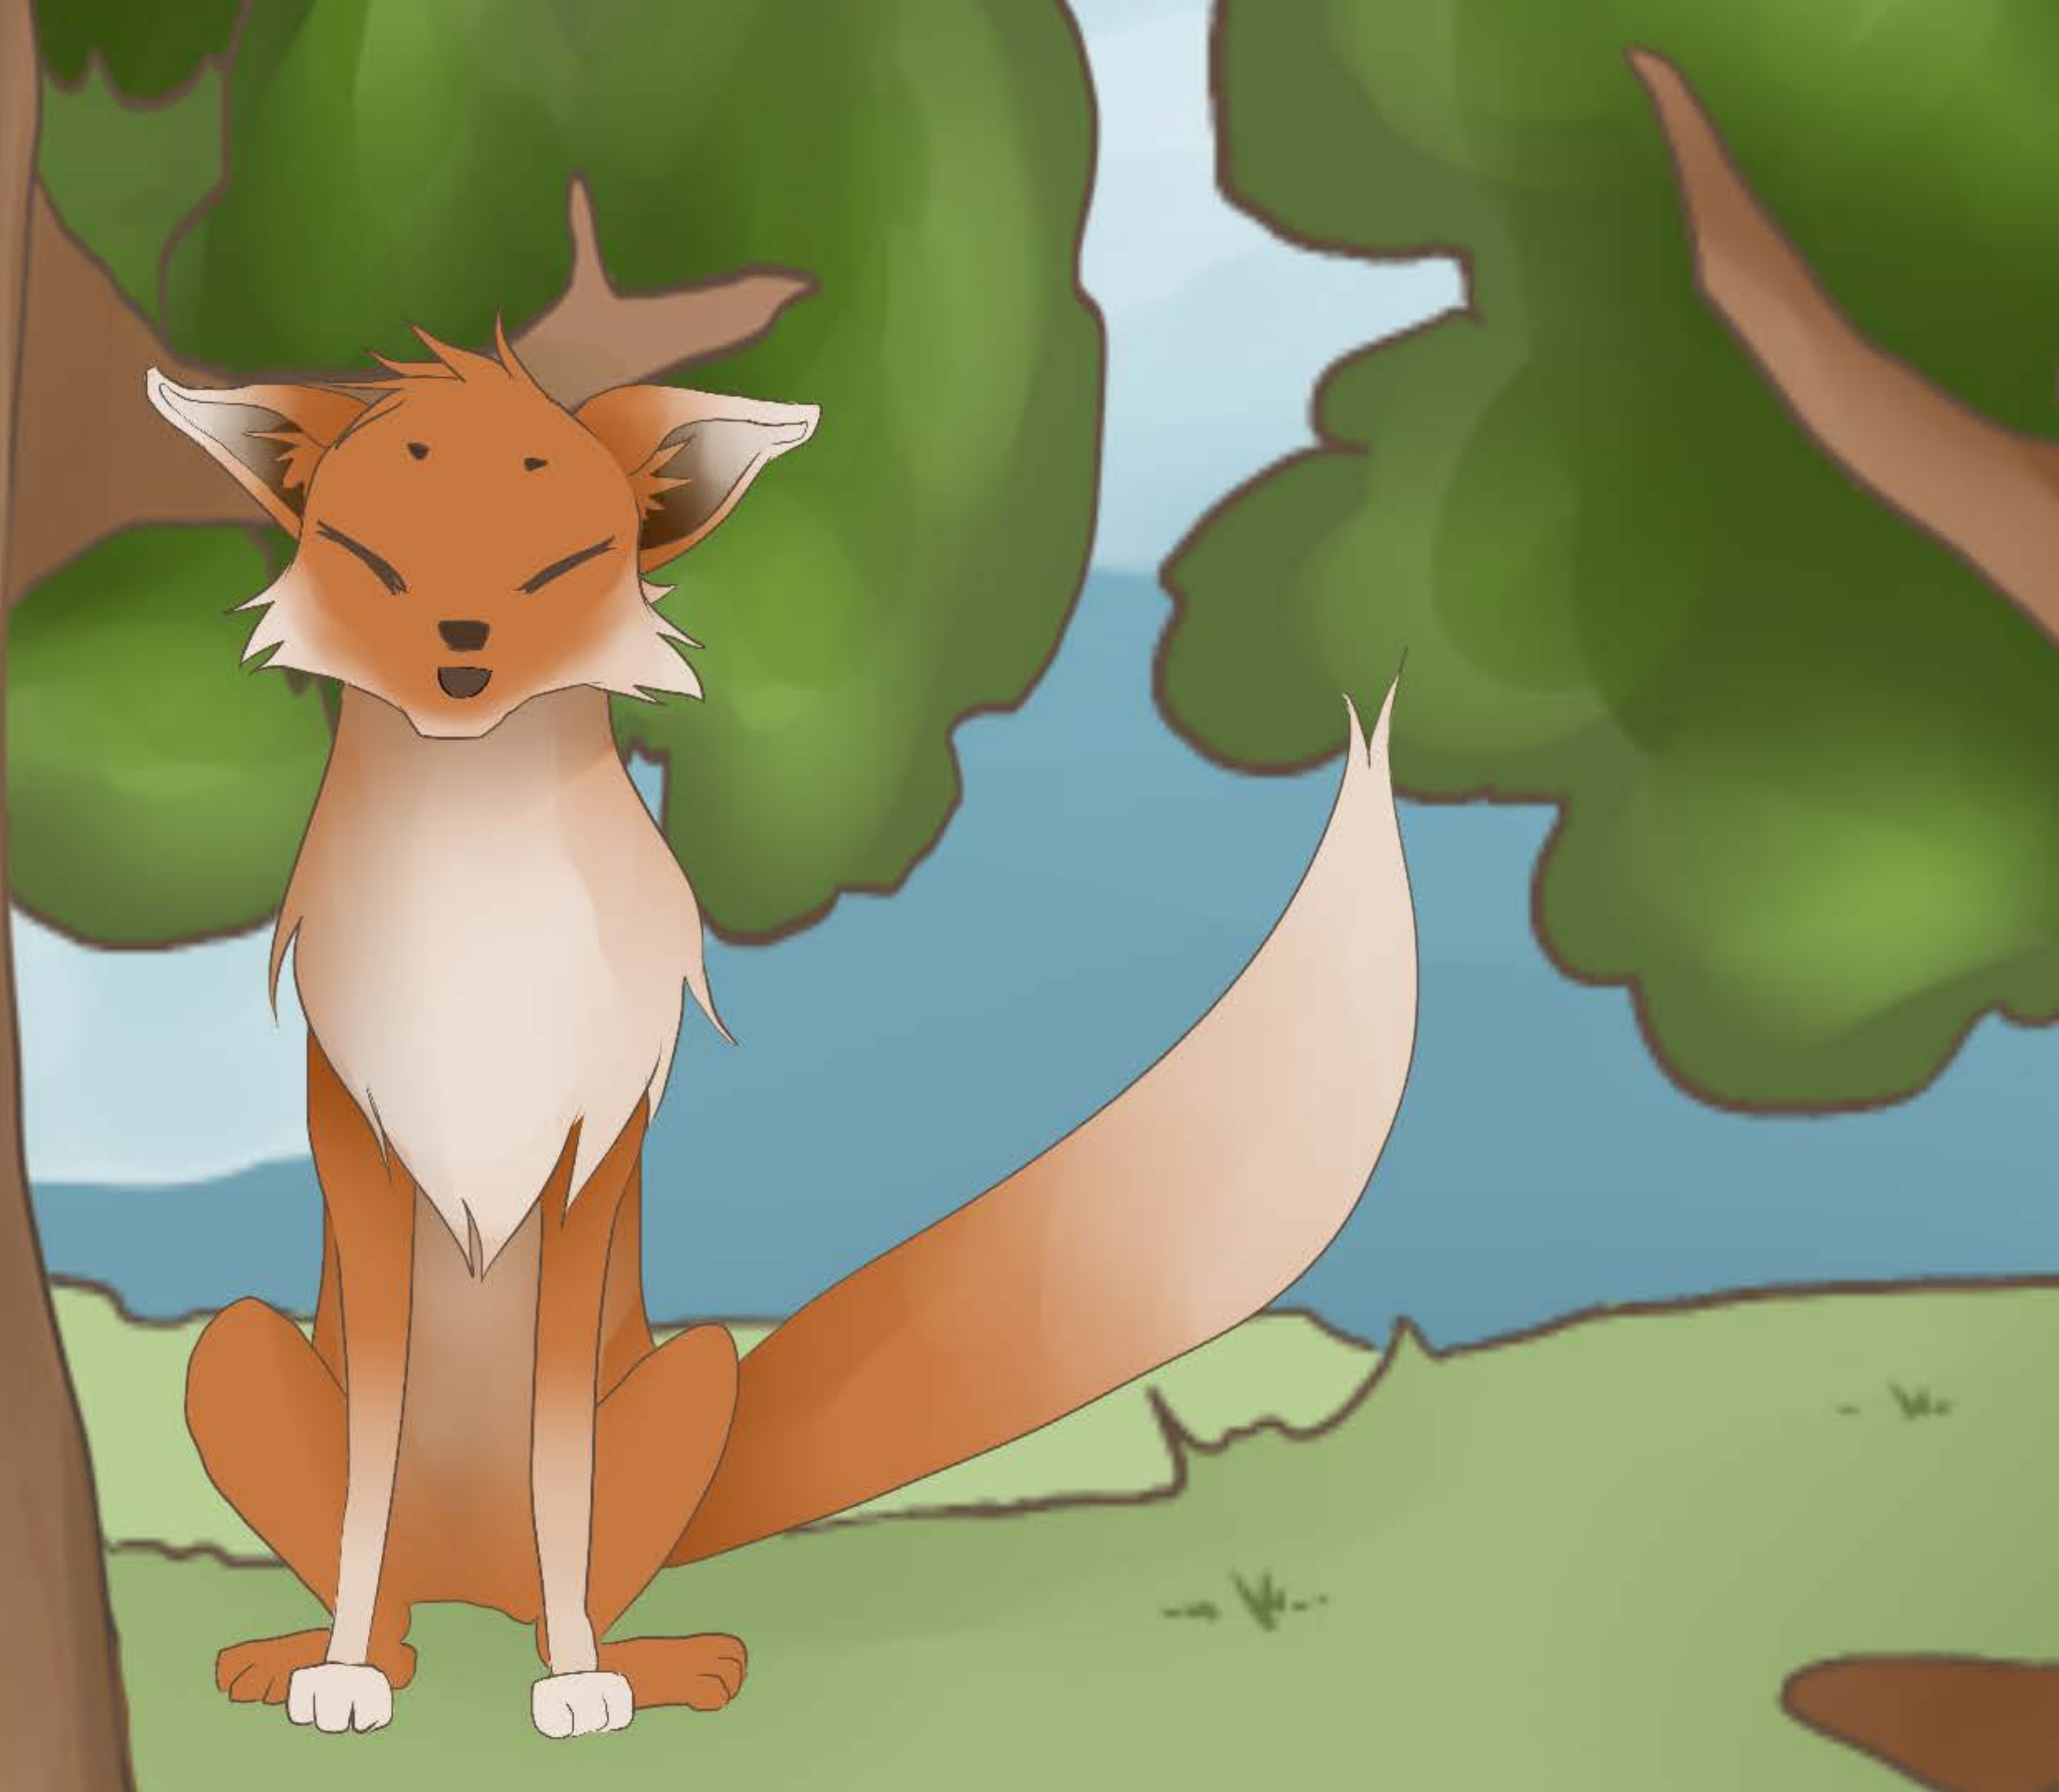

Socks has placed your worry in the box.

Visualize it floating away.

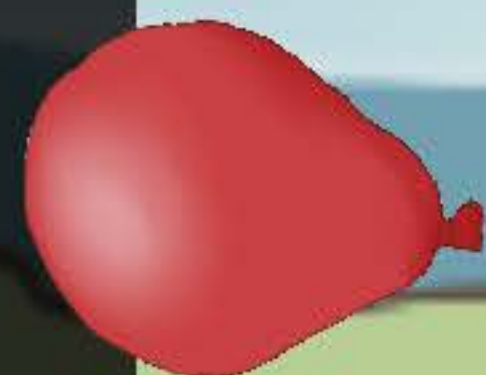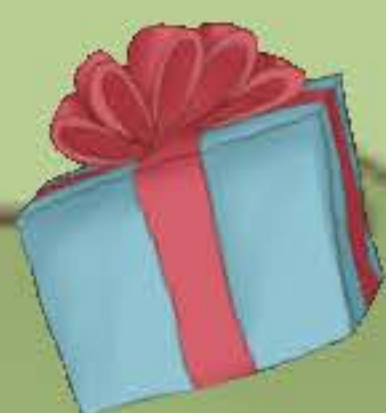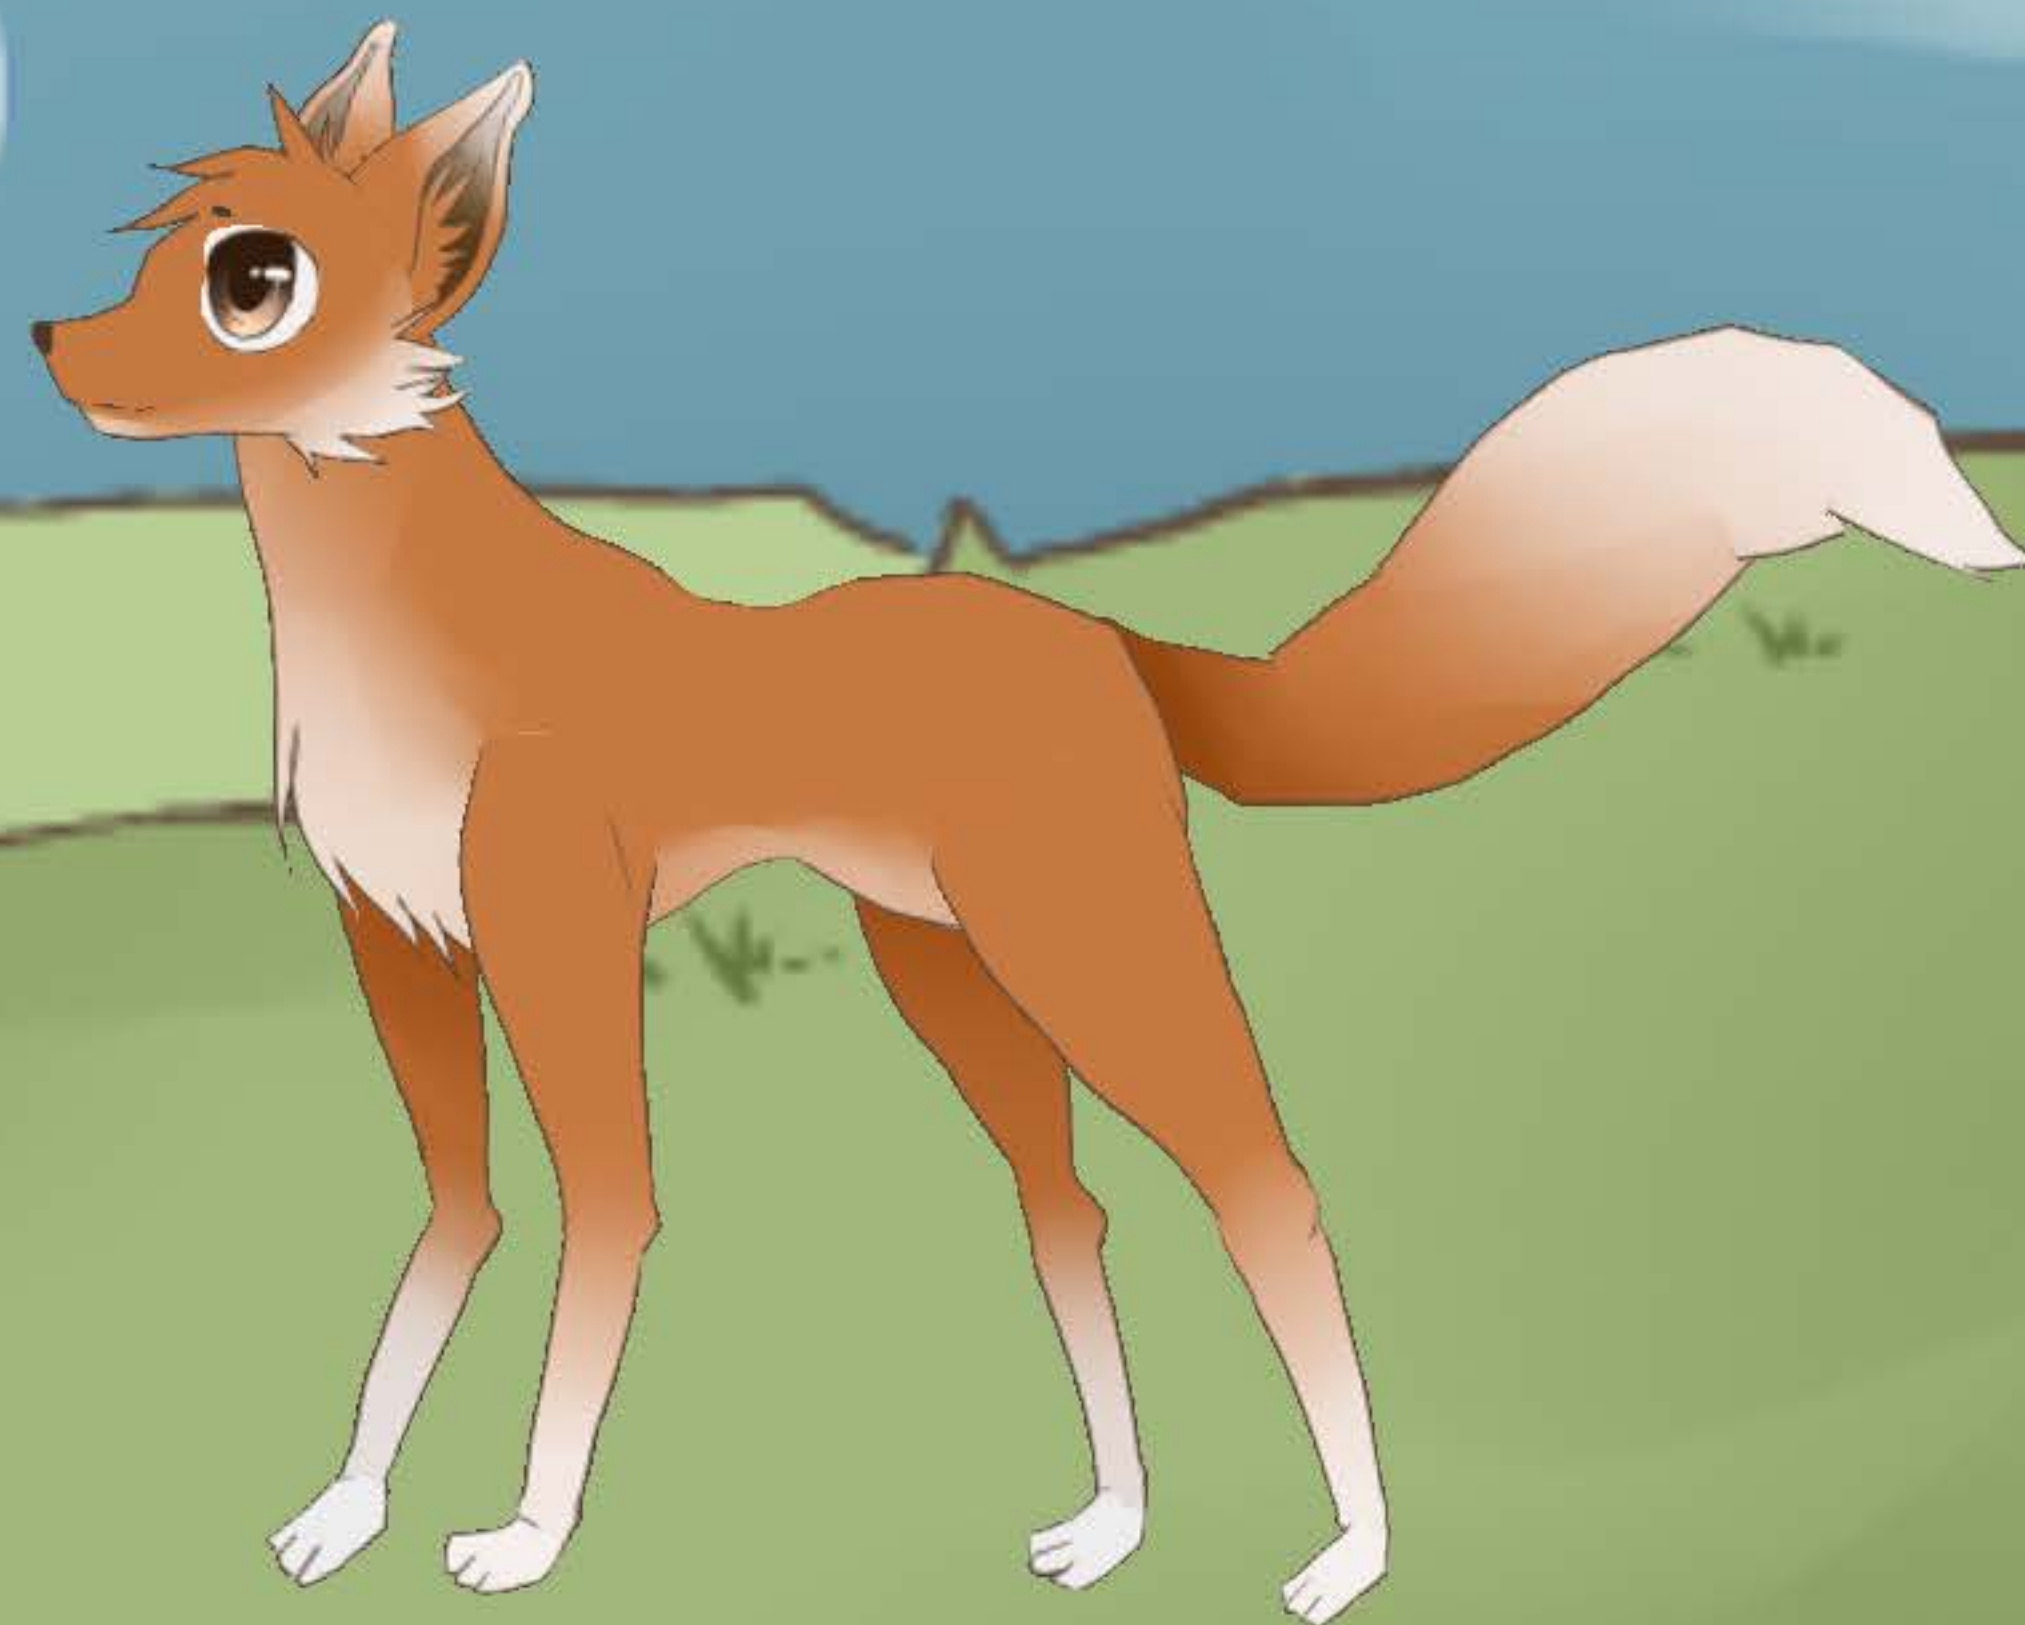

Supplement: mhealth_v6i3e64_app1.pdf [file mhealth_v6i3e64_app1.pdf]
